# Supplementary material for: Distinct Mechanisms for Induction and Tolerance Regulate the Immediate Early Genes Encoding Interleukin 1β and Tumor Necrosis Factor α
Source: PubMed Central journal article supplement (PMC3731334; doi:10.1371/journal.pone.0070622), 2013-08-01
Supplement: pone.0070622.s006.pdf [file pone.0070622.s006.pdf]

**Table S1. Relative Levels of -1 and +1 Nucleosome Marks in Relationship to Amount of H3 on *IL1B* in THP1 Cells**

|                                  |          | <i>TNF</i> |      |      | <i>IL1B</i> |      |      |
|----------------------------------|----------|------------|------|------|-------------|------|------|
|                                  |          | 0 h        | 1 h  | 5h   | 0 h         | 1 h  | 5 h  |
| Nucleosome Mark<br>+1 Nucleosome | H3K4me3  | 0.19       | 0.56 | 0.75 | 0.02        | 0.03 | 0.24 |
|                                  | H3K9ac   | 0.83       | 1.61 | 0.98 | 0.28        | 0.31 | 0.65 |
|                                  | H3K27me3 | 0.04       | 0.17 | 0.08 | 0.02        | 0.03 | 0.06 |
|                                  | H3K36me3 | 0.21       | 0.56 | 0.56 | 0.02        | 0.03 | 0.17 |
| Nucleosome Mark<br>-1 Nucleosome | H3K4me3  | 0.05       | 0.13 | 0.62 | 0.06        | 0.09 | 0.50 |
|                                  | H3K9ac   | nd         | nd   | nd   | 0.06        | 0.64 | 1.33 |
|                                  | H3K27me3 | 0.05       | 0.13 | 0.08 | 0.06        | 0.09 | 0.17 |
|                                  | H3K36me3 | 0.20       | 0.25 | 0.31 | 0.06        | 0.09 | 0.42 |

**Table S2. Antibodies Used For ChIP and Western Blots**

| EPITOPE              | SOURCE                         | CATALOG NUMBER | AGAROSE IP               |
|----------------------|--------------------------------|----------------|--------------------------|
| RNA Pol II (N-20)    | Santa Cruz Biotechnology, Inc. | sc-899         | Protein A                |
| RNA Pol II CTD Ser5  | Babco-Covance                  | MMS-134R       | Protein M                |
| RNA Pol II CTD Ser2  | Babco-Covance                  | MMS-129R       | Protein M                |
| RNA Pol II 8WG16     | Babco-Covance                  | MMS-126R       | Protein M                |
| Cdk9 (H-169)         | Santa Cruz Biotechnology, Inc. | sc-8338        | Protein A                |
| NELF-A (A-20)        | Santa Cruz Biotechnology, Inc. | sc-23599       | Protein G                |
| PU.1 (H-135)         | Santa Cruz Biotechnology, Inc. | sc-22805       | Protein A                |
| PU.1/Spi-1 (T-21)    | Santa Cruz Biotechnology, Inc. | sc-352         | Protein A                |
| TFIID (TBP) (SI-1)   | Santa Cruz Biotechnology, Inc. | sc-273         | Protein G                |
| TBP                  | Abcam, Inc.                    | ab28175        | Protein A                |
| C/EBP $\beta$ (47A1) | Santa Cruz Biotechnology, Inc. | sc-56637       | Protein G                |
| H3 (tri methyl K36)  | Abcam, Inc.                    | ab9050         | Protein A                |
| H3 (tri methyl K27)  | Active Motif                   | 39156          | Protein G                |
| H3 (tri acetyl K27)  | Abcam, Inc.                    | ab4729         | Protein A                |
| H3 (mono methyl K9)  | Millipore                      | 07-450         | Protein A                |
| H3 (acetyl K9)       | Upstate                        | 07-352         | Protein A                |
| H3 (mono methyl K4)  | Active Motif                   | 39635          | Protein G                |
| H3 (tri methyl K4)   | Active Motif                   | 39915          | Protein A                |
| Histone H3 (FL-136)  | Abcam, Inc.                    | ab1791         | Protein A                |
| BRD4                 | Abcam                          | ab84776        | Protein A                |
| P300 (N15)           | Santa Cruz Biotechnology, Inc. | Sc-584         | Protein A/G <sup>+</sup> |
| NF $\kappa$ B p65    | Abcam, Inc.                    | ab7970         | Protein A                |
| Anti-proIL-1 $\beta$ | R&D Systems                    | MAB6964        | (Western Blot)           |

**Table S3. Human *TNF* Primer Sequences**

| Position | Forward                    | Reverse                    |
|----------|----------------------------|----------------------------|
| -243     | CACAAATCAGTCAGTGGCCAGAA    | GGACACACAAGCATCAAGGATACC   |
| -181     | GGTATCCTTGATGCTTGTGTGCC    | CTGCACCTTCTGTCTCGGTTTCTT   |
| -128     | GGAGAAGAAACCGAGACAGAAGGT   | CTTCCTTGGTGGAGAAACCCATGA   |
| -98      | ACTACCGCTTCCAGATGAG        | GGGAAAGAATCATTCAACCAGCGG   |
| -50      | CCGCTGGTTGAATGATTCTT       | TGTGCCAACAACTGCCTTTA       |
| -15      | CCCAGGGACATATAAAGGCAGTTG   | TGTCCTTGCTGAGGGAGCGT       |
| +18      | TTGGCACACCCAGCCAGCAGA      | GGTCTGTAGTTGCTTCTCTCCCTCTT |
| +57      | CCAGCTAAGAGGGAGAGAAGCAACTA | ATGTGGCGTCTGAGGGTTGTTT     |
| +97      | AAACAACCCCTCAGACGCCACAT    | TATGTGAGAGGAAGAGAACCCTGCC  |
| +145     | AGGCAGGTTCTCTCTCTCACAT     | TGCTTTCAGTGCATGCTGTCTCT    |
| +214     | TGGAAAGGACACCATGAGCACTGA   | TGAGGAACAAGCACCGCCT        |
| +293     | AGCGGTGCTTGTCTCTCA         | TCCAAAGTGCAGCAGGCAGAAGA    |
| +473     | TGGGTGAAAGATGTGCGCTGATAG   | TTGCCACATCTCTTCTGCATCCC    |
| +1326    | ATGTGCTTGGAACTGGAGGGCT     | TATCCCACTAAGGCGCTGTCTGTT   |
| +1806    | TCAACCTCCTCTGCCATCAAGA     | ATAGATGGGCTCACCAGGGCTT     |
| +2014    | AGGACGAACATCCAACCTTCCCAA   | TTTGAGCCAGAAGAGGTTGAGGGT   |

**Table S4. Human *JUNB* and *HIST1H4K* Primer Sequences**

***JUNB***

| Position | Forward                | Reverse               |
|----------|------------------------|-----------------------|
| -96      | CCGCTGTTTACAAGGACACG   | GGAAAGTGGCTCCGATTG    |
| +33      | GGCTGGGACCTTGAGAGC     | GTGCGCAAAGCCCTGTC     |
| +78      | TGACTAGCGCGGTATAAAGCGT | CGATAGCTTCTGCGCTCGTTT |
| +793     | GGACGATCTGCACAAGATGA   | TGCTGAGGTTGGTGTAAACG  |
| +1157    | CATCAAAGTGGAGCGCAA     | TTGAGCGTCTCACCTTGTC   |
| +1969    | CCAGCTCAGTGCTGTTGGT    | ATCCAACCCTGGAGATCTGG  |

***HIST1H4K***

|      |                          |                      |
|------|--------------------------|----------------------|
| +35  | GACTCCTCTTGCTCGTCATGTCTG | CGCCTTTGCCAAGACCCT   |
| +237 | GGTGCTGAAGGTGTTCTGCG     | CGCTTGGCGTGCTCTGTA   |
| +382 | GGTTGAGCGTCCCTTCTATCAACA | TGGGCAAACAAGCATCACGG |

Numbers indicate the midpoint of amplicons in relation to the TSS

**Table S5. Human *IL1B* Primer Sequences**

| Position | Forward                        | Reverse                    |
|----------|--------------------------------|----------------------------|
| -3000    | CCAAGGAAGTGAACAAGCAGAGA        | CCAAGGAAGTGAACAAGCAGAGA    |
| -2876    | TCTCCTTGGGAAGACAGGATCTGA       | ACCTGGACCCAAATCTGCTACCAT   |
| -2790    | ACATGGCAGAAGTGTGGAGACTGT       | ATAGCACAGTGTGGTTGAAGCAGC   |
| -2329    | TCCCTTCCTGTCACTGGCTTTGAT       | TGCATGATCACAGCAGCCTCAAAC   |
| -1520    | ATCAGAAGGCTGCTTGGAGAGCAA       | TGCATTATCCAAGGGAGTGAGCCT   |
| -800     | TAGGCAGAGCTCATCTGGCATTGA       | ATTGCAGGAGCCTCTGAGGAGAAA   |
| -279     | TGTGTGCTTCCACTTTGTCCAC         | CCTGACAATCGTTGTGCAGTTGATG  |
| -223     | TGTGGACATCAACTGCACAACG         | TTCATGGAAGGGCAAGGAGTAGCA   |
| -155     | TTGCTACTCCTTGCCTTCCATGA        | GAGTATTGGTGGAAAGCTTCTTAGGG |
| -91      | CCCTAAGAAGCTTCCACCAATACTC      | GCAGAAGTAGGAGGCTGAGAAA     |
| -19      | CCCTAAGAAGCTTCCACCAATACTC      | GCAGAAGTAGGAGGCTGAGAAA     |
| +36      | AAACCTCTTCGAGGCACAAG           | GAGCAATGAAGATTGGCTGA       |
| +98      | CAGCCAATCTTCATTGCTCA           | GCATACACACAAAGAGGCAGAG     |
| +160     | CTCTGCCTCTTTGTGTATGC           | GAGGGAAGGAGAGGGAGAGA       |
| +223     | TCTCCCTCTCCTTCCCTCTC           | TTCCCAGAATATTTCCCGAGT      |
| +271     | GCCAGGTGTAATATAATGCTTATGACTCGG | GACACTAACCTTTAGGGTGTGAGC   |
| +505     | TGCACTGGATGCTGAGAGAAA          | GGCTGCTTCAGACACCTGTG       |
| +1031    | AATCTGCCTTCTGGACTGTTCTGC       | AAGAACTGCAACAGCCTGCCTC     |
| +3325    | AATCTCCGACCACCACTACAGCAA       | AAGGAAAAGAAGGTGCTCAGGTCA   |
| +4000    | TCGACACATGGGATAACGAGGCTT       | TGGAGGTGGAGAGCTTTCAGTTCA   |
| +5389    | ACTGCTGTGCCCTAACCAAGA          | TTCACACGCAGGACAGGTACAGA    |
| +6268    | TCGCTGCAGAGTGTAGATCCAAA        | TGCTTGAGAGGTGCTGATGTACCA   |
| +7192    | CCTCATTGCTGAGTGCTGCAAAGT       | AGTGCTTCAGCTGATCCTGTCCA    |

Numbers indicate the midpoint of amplicons in relation to the TSS

**Table S6. Murine *Il1b* and *Tnf* ChIP Primer Sequences**

***Il1b***

| Position | Forward                  | Reverse                    |
|----------|--------------------------|----------------------------|
| -408     | TGATGGAGAGCACAGAAGCACCAT | ACGTAGATGCACACCCAGAAGTGT   |
| +31      | ACAAGTTGGACAACAAACCCTGC  | TACTTGCACAAGGAAGCTTGGCTGGA |
| +1126    | AGGGACTCTACAGATGCAATGGT  | TGCTCTGGTTGCTCTCTGTTGACT   |
| +3627    | AAATCCAATGTTCTTGCCAGCCC  | TGCAAGCACTGTGAAGTGAAGCAG   |
| +5169    | GCCTTGGCCTCAAAGGAAAGAAT  | TAAAGGCAGAGTCTTCGGTGAGCA   |
| +6478    | ATAGCCCGCACTGAGGTCTTTCAT | CTCATCAAAGCAATGTGCTGGTGC   |

***Tnf***

| Position | Forward                  | Reverse                  |
|----------|--------------------------|--------------------------|
| -404     | TATGCACCCAGCTTTCAGAAGCAC | AGGACCCTGAGAACTGAAACCCAT |
| -79      | ACTACCGCTTCTCCACATGAGAT  | AGACGGCCGCTTTATAGCCCTT   |
| +15      | CTCTTCCCCAAGGGCTATAAAGG  | CTTGCTTTTCTGGGAGCTATTTCC |
| +71      | ACTAGCCAGGAGGGAGAACAGAAA | AGTGAGTGAAGGGACAGAACCTG  |
| +797     | AAAGAAGCCGTGGGTTGGACAGAT | AGAACTGATGAGAGGGAGGCCATT |
| +1585    | AGCCGATGGGTTGTACCTGTCTA  | TGAGATAGCAAATCGGCTGACGGT |
| +2106    | TCTCATGCACCACCATCAAGGACT | ACCACTCTCCCTTTCAGAACTCA  |
| +2937    | GTACTGCAGTCTTCCGGCTGTT   | TCTGTCTGTTCCAGGGCAGGTTGA |

Numbers indicate the midpoint of amplicons in relation to the TSS

**Table S7. mRNA Analysis and qPCR Primer Sequences**

| Gene        | Forward                  | Reverse                  |
|-------------|--------------------------|--------------------------|
| 18srRNA     | TAGAGGGACAAGTGGCGTTC     | TCCTCGTTCATGGGGAATAA     |
| hB2M        | TGCTGTCTCCATGTTTGATGTATC | TCTCTGCTCCCCACCTCTAAGT   |
| mB2M        | GGCCTGTATGCTATCCAGAA     | GAAAGACCAGTCTTGCTGA      |
| hIL1B       | AATCTCCGACCACCACTACAGCAA | AAGGGAAAAGAGGTGCTCAGGTCA |
| Splice IL1B | TCTGTACCTGCTCTGCGTGTGAA  | GGGCAGACTCAAATCCAGCTTGT  |
| mIL1B       | CCCAACTGGTACATCAGCAC     | TCTGCTCATTACGAAAAGG      |
| hTNF        | AAGCCCTGGTATGAGCCCATCTAT | ATGATCCCAAAGTAGACCTGCCCA |
| Splice TNF  | AGTGACAAGCCTGTAGCCCATGTT | GTTATCTCTCAGCTCCACGCCATT |
| mTNF        | CCCACTCTGACCCCTTACT      | TTTGAGTCTTGATGGTGGT      |
| hSPH        | CCAGCTCAGATGAGGAGGAG     | GCTTGGACGAGAACTGGAAG     |
| hC/EBPA     | TGGCCAACCTTCTACTACGAGG   | AGAGGAAGTCGTGGTGCTGC     |
| hC/EBPB     | TACTACGAGGCGGACTGCTT     | CGTAGTCGTGGGAGAAGAGG     |
| p65         | GGCGAGAGGAGCACAGATAC     | CACTGTCACTGGAAGCAGA      |
| hIRF8       | ACGAGGTTACGCTGTGCTTT     | CCAGTCTGGAAGGAGCTGAC     |

**Site directed mutagenesis primer sequences**

**IL1B enhancer I region XT-I (c/g)-Luc primer pairs:**

I (c/g) F: 5'CTGTGGAGACTGTTAGGTCAGGGGGCATTGC3'  
 I (c/g) R: 5'GCAATGCCCCCTGACCTAACAGTCTCCACAG3'

**NF-κB site (-300) mutation**

XT-300 F:  
 5'AACATTCTTAACGTGTGAAAATACAGTATTTAATGTGGACATC3'  
 XT-300 R:  
 5'GATGTCCACATTAATACTGTATTTTCACAGTTAGAAGAATGTT3'

I region / NF-κB site (-300) double mutant was engineered by using the XT-I(c/g)-Luc plasmid as a template and the XT-300mut(F)/(R) as primers.

**Table S8. Human *IL1B* 3C Primer Sequences**

| Designation | Position        | Sequence               |
|-------------|-----------------|------------------------|
| 1'          | -12369 / -12349 | GGGGCCTCCAAATCACTAAGC  |
| 2           | -2772 / -2750   | GCATTGCCCATGGCTCCAAAAT |
| 3'          | -482 / -504     | TCTTACCTGGGTGCTGTTCTC  |
| 4           | 4605 / 4627     | CCGCTGTAACGGGCAAAGTTTC |
